# Supplementary material for: The Cattle Fever Tick, Rhipicephalus microplus, as a Model for Forward Pharmacology to Elucidate Kinin GPCR Function in the Acari
Source: Front Physiol. 2019 Aug 7;10:1008. doi: 10.3389/fphys.2019.01008 (PMC6692460; doi:10.3389/fphys.2019.01008)
Supplement: Supplementary file 1 [file Table_1.xlsx]

## Sheet: Suppl. Table1. primers
Title: The cattle fever tick, Rhipicephalus microplus, as a model for forward pharmacology to elucidate kinin GPCR function in the Acari
Supplementary Table 1. List of primers used in this study.
Primers used in 5'/3'-RACE PCR
Primer name	Orientation	Template for primer design	Sequence (5'-3')	Purpose	Product sequenced
RmkininP1-F	Forward	GEEZ01003316.1	GGGAGGCAAGAGGGACACGTTCAGC	3'RACE PCR	yes, 813 bp towards 3'end
RmkininP1-R	Reverse	GEEZ01003316.1	CTTCCCCGGTTCCCCTCTTTCCTCC	5'RACE PCR	yes, 780 bp towards 5'end
Universal primer short		Clontech® Universal primer mix	CTAATACGACTCACTATAGGGCAAGCAGTGGTATCAACGCAGAGT	3'/5' RACE PCR
Universal primer long			CTAATACGACTCACTATAGGGC
Primers used for cloning cDNA ORF in one product and gene amplification
Primer name	Orientation	Template for primer design	Sequence (5'-3')	Purpose	Product sequenced or not
Rmk-ORF-F	Forward	cloned cDNA of the putative kinin precursor	CGCTGCTAGAGGCCCCATCGACG	regular PCR to amplify the ORF from cDNA and gDNA	yes, 1339bp fragment in cDNA; 3990bp in gDNA
Rmk-ORF-R	Reverse	cloned cDNA of the putative kinin precursor	GTTTTTCGAACGGGCGCTTCGCTAC	regular PCR to amplify the ORF from cDNA and gDNA
Bmkinin-g-long-F	Forward	LYUQ01126194.1	ACCTCAGTCCCTCTGCTGGTTCAGG	regular PCR to amplify the 3'end of kinin gene	yes 1378 bp PCR product containing the 3'-end of kinin gene was sequenced
Bmkinin-g-long-R	Reverse	LYUQ01126194.1	CCAACAGGCAGTGCGTTACCTCAGC	regular PCR to amplify the 3'end of kinin gene
Bmk-ORF-5'end-F	Forward	cloned cDNA of the putative kinin precursor	ACATGGGGAGCAACAGGCGCTGC	regular PCR to amplify the 5'end of kinin gene	yes, 220bp towards the 5'-end of kinin gene was sequenced from the ~3.5 kb PCR product
RmkininP1-R	Reverse	cloned cDNA of the putative kinin precursor	CTTCCCCGGTTCCCCTCTTTCCTCC	regular PCR to amplify the 5'end of kinin gene
Primers used for sequencing
Primer name	Orientation	Template for primer design	Sequence (5'-3')	Purpose
Bmk-g-2ndF	Forward	partial kinin gene	CTGAGACACTGCGCAAGCAC	sequencing 4kb ORF region of kinin gene
Bmk-g-thirdF	Forward	partial kinin gene	GACTTCCGTTTGGTAATCAAC	sequencing 4kb ORF region of kinin gene
Bmk-g-thirdR	Reverse	partial kinin gene	GCAGAAGCGAGTACATGATG	sequencing 4kb ORF region of kinin gene
Rmk-ORF-F	Forward	cloned cDNA of the putative kinin precursor	CGCTGCTAGAGGCCCCATCGACG	sequencing 4kb ORF region of kinin gene
Rmk-ORF-R	Reverse	cloned cDNA of the putative kinin precursor	GTTTTTCGAACGGGCGCTTCGCTAC	sequencing 4kb ORF region of kinin gene
Rmkinin-5'end-R	Reverse	partial kinin gene	CGTCTACGCTTCATCGAAACG	sequencing the 5'-end of kinin gene
Bmkinin-g-long-F	Forward	LYUQ01126194.1	ACCTCAGTCCCTCTGCTGGTTCAGG	sequencing the 3'-end of kinin gene
Bmkinin-g-long-R	Reverse	LYUQ01126194.1	CCAACAGGCAGTGCGTTACCTCAGC	sequencing the 3'-end of kinin gene
T7 Promoter Primer	Forward	vector pCR2.1®	TAATACGACTCACTATAGGG	sequencing cloned cDNA sequences
M13 reverse primer	Reverse	vector pCR2.1®	CAGGAAACAGCTATGACC	sequencing cloned cDNA sequences

## Sheet: Suppl. Table2. Tested compounds
Title: The cattle fever tick, Rhipicephalus microplus, as a model for forward pharmacology to elucidate kinin GPCR function in the Acari
Supplementary Table 2. List of chemicals tested.
The information below was obtained from Tocris® Bioscience (R&D Ssystem, Bristol, UK) (https://www.tocris.com/)
Small molecule name in this paper	Product Name (Tocris™)	Chemical Name	Mol Wt	Primary Action	Activitiy on vertebrate endogenous receptors
TKSM1	L-732,138	N-Acetyl-L-tryptophan 3,5-bis(trifluoromethyl)benzyl ester	472.39	Potent, selective NK1 antagonist	IC50 = 2.3 nM
TKSM2	L-733,060 hydrochloride	(2S,3S)-3-[[3,5-bis(Trifluoromethyl)phenyl]methoxy]-2-phenylpiperidine hydrochloride	439.83	Potent NK1 antagonist	Ki values are 0.08, 0.2 and 93.13 nM for gerbil, human and rat receptors, respectively)
TKSM3	GR 159897	5-Fluoro-3-[2-[4-methoxy-4-[[(R)-phenylsulphinyl]methyl]-1-piperidinyl]ethyl]-1H-indole	423.55	Non-peptide, potent NK2 antagonist	Competes for binding of [3H]GR100679 to hNK2-transfected CHO cells with a pKi of 9.5
TKSM4	SB 218795	(R)-[[2-Phenyl-4-quinolinyl)carbonyl]amino]-methyl ester benzeneacetic acid	396.44	Potent, selective non-peptide NK3 antagonist	(Ki = 13 nM at hNK3). Displays 90-fold and 7000-fold selectivity over hNK2 and hNK1 receptors respectively.
TKSM5	SB 222200	3-Methyl-2-phenyl-N-[(1S)-1-phenylpropyl]-4-quinolinecarboxamide	380.48	Potent, selective non-peptide NK3 antagonist. Brain penetrant	Ki values are 4.4, > 100,000 and 250 nM for human NK3, NK1 and NK2receptors respectively
TKSM6	RP 67580	(3aR,7aR)-Octahydro-2-[1-imino-2-(2-methoxyphenyl)ethyl]-7,7-diphenyl-4H-isoindol	443.07	Potent and selective NK1 antagonist	Ki values are 2.9 nM and > 10 μM for rat NK1, and rat NK2 and NK3 receptors respectively
TKSM7	SDZ NKT 343	1-[[(2-Nitrophenyl)amino]carbonyl]-L-prolyl-N-methyl-3-(2-naphthalenyl)-N-(phenylmethyl)-L-alaninamide	584.15	Highly selective, human NK1 antagonist	IC50 values are 0.62 and 451 nM for human and rat receptors respectively
TKSM8	FK 888	(4R)-4-Hydroxy-1-[(1-methyl-1H-indol-3-yl)carbonyl]-L-prolyl-N-methyl-3-(2-naphthalenyl)-N-(phenylmethyl)-L-alaninamide	597.7	High affinity NK1 receptor antagonist	(Ki = 0.69 nM) that displays 320-fold selectivity for human over rat NK1receptors.
TKSM9	CP 96345	(2S,3S)-N-(2-Methoxyphenyl)methyl-2-diphenylmethyl-1-azabicyclo[2.2.2]octan-3-amine	412.57	Potent and selective NK1 antagonist	Attenuates substance P-induced salivary response and inhibits neurogenic inflammation in vivo.
TKSM10	SSR 146977 hydrochloride	N1-[1-3-[(3R)-1-Benzoyl-3-(3-(3,4-dichlorophenyl)-3-piperidinyl]propyl]-4-phenyl-piperidinyl]-N,N-dimethylurea hydrochloride	694.14	Potent and selective NK3 antagonist	Ki values are 0.26 and 19.3 nM in CHO cells expressing the human NK3 and NK2 receptor respectively
TKSM11	CP 99994 dihydrochloride	(2S,3S)-N-[(2-Methoxyphenyl)methyl]-2-phenyl-3-piperidinamine dihydrochloride	373.83	High affinity NK1 antagonist	Ki = 0.145 nM in vitro
TKSM12	SR 140333	1-[2-[(3S)-3-(3,4-Dichlorophenyl)-1-[2-[3-(1-methylethoxy)phenyl]acetyl]-3-piperidinyl]ethyl]-4-phenyl-1-azoniabicyclo[2.2.2]octane chloride	674.14	Potent NK1 receptor antagonist	Ki = 0.74 nM. IC50 = 1.6 nM
TKSM13	L 760735	5-[[(2R,3S)-2-[(1R)-1-[3,5-Bis(trifluoromethyl)phenyl]ethoxy]-3-(4-fluorophenyl)-4-morpholinyl]methyl-N,N-dimethyl-1H-1,2,3-triazole-4-methanamine hydrochloride	620.99	High affinity NK1 receptor antagonist	IC50 = 0.19 nM at human NK1 receptors). Selective (>300-fold) over h-NK2 and h-NK3 receptors.
TKSM14	SB 223412	3-Hydroxy-2-phenyl-N-[(1S)-1-phenylpropyl]-4-quinolinecarboxamide	386.95	Potent, selective non-peptide NK3 antagonist. Brain penetrant	Ki values are 1, 144 and >100000 nM for human NK3, NK2 and NK1 receptors respectively
Peptidomimetics	CAS number	Amino acid sequence	Mol Wt	Primary action	Activtiy on vertebrate endogenous receptors
Hemokinin 1 (Human)	491851-53-7	Thr-Gly-Lys-Ala-Ser-Gln-Phe-Phe-Gly-Leu-Met-NH2 (TGKASQFFGLMa)	1185.4	Endogenous substance P homolog that is a selective agonist at the tachykinin NK1 receptor	IC50 values are 1.8, 370 and 480 nM for NK1, NK3 and NK2 receptors respectively
Antagonist G	115150-59-9	Arg-D-Trp-N(Me)Phe-D-Trp-Leu-Met-NH2 (RWFWLMa)	951.2	Substance P analog that is a broad spectrum neuropeptide antagonist and antiproliferative agent.
Spantide I	91224-37-2	D-Arg-Pro-Lys-Pro-Gln-Gln-D-Trp-Phe-D-Trp-Leu-Leu-MH2 (RPKPQQWFWLLa)	1497.8	Selective NK1 receptor antagonist	Ki values are 230, 8150 and > 10000 nM for rat NK1, NK2 and NK3 receptors respectively

## Sheet: Suppl. Table3. screening-1
	Title: The cattle fever tick, Rhipicephalus microplus, as a model for forward pharmacology to elucidate kinin GPCR function in the Acari
	Supplementaty Table 3. First screening of the whole library in 384-well plate format. Panel A shows in each well the 10x concentration of each compound; final concentration in the assay is 1x; Panel B is the response (1- 4min after the 1st injection) of BMLK3 cells (tick kinin rceptor recombinant cell line), to the compound; Panel C is the response of BMLK3 cells (5-9 min after the 2nd injection)…
				Small molecules were serially diluted 1: 1.4, 19 times, from the initial concentration (1mM for 15 small molecules or 100 µM for thapsigargin, in column 3, 80 µl) into the most diluted column 22, by transferring 56 µl solution of previous higher concentration into the next well and mixing with 24 µl of blank solvent (2 % DMSO). The magenta gradient in the arrow below represents the dilution direc…
A	Library plate: 10x of the final concentration solution, prepared in 2 % DMSO in Hanks’ Saline Buffer containing 20 mM Hepes (HHBS)
Compound	Unit: µM	1	2	3	4	5	6	7	8	9	10	11	12	13	14	15	16	17	18	19	20	21	22	23	24
2-APB	A	Blank solvent (2 % DMSO in HHBS)		1000	700	490	343	240.1	168.07	117.649	82.3543	57.648	40.3536	28.2475	19.7733	13.8413	9.6889	6.78223	4.74756	3.32329	2.32631	1.62841	1.13989	Blank solvent (2 % DMSO in HHBS)
TKSM1	B			1000	700	490	343	240.1	168.07	117.649	82.3543	57.648	40.3536	28.2475	19.7733	13.8413	9.6889	6.78223	4.74756	3.32329	2.32631	1.62841	1.13989
TKSM2	C			1000	700	490	343	240.1	168.07	117.649	82.3543	57.648	40.3536	28.2475	19.7733	13.8413	9.6889	6.78223	4.74756	3.32329	2.32631	1.62841	1.13989
TKSM3	D			1000	700	490	343	240.1	168.07	117.649	82.3543	57.648	40.3536	28.2475	19.7733	13.8413	9.6889	6.78223	4.74756	3.32329	2.32631	1.62841	1.13989
TKSM4	E			1000	700	490	343	240.1	168.07	117.649	82.3543	57.648	40.3536	28.2475	19.7733	13.8413	9.6889	6.78223	4.74756	3.32329	2.32631	1.62841	1.13989
TKSM5	F			1000	700	490	343	240.1	168.07	117.649	82.3543	57.648	40.3536	28.2475	19.7733	13.8413	9.6889	6.78223	4.74756	3.32329	2.32631	1.62841	1.13989
TKSM6	G			1000	700	490	343	240.1	168.07	117.649	82.3543	57.648	40.3536	28.2475	19.7733	13.8413	9.6889	6.78223	4.74756	3.32329	2.32631	1.62841	1.13989
TKSM7	H			1000	700	490	343	240.1	168.07	117.649	82.3543	57.648	40.3536	28.2475	19.7733	13.8413	9.6889	6.78223	4.74756	3.32329	2.32631	1.62841	1.13989
TKSM8	I			1000	700	490	343	240.1	168.07	117.649	82.3543	57.648	40.3536	28.2475	19.7733	13.8413	9.6889	6.78223	4.74756	3.32329	2.32631	1.62841	1.13989
TKSM9	J			1000	700	490	343	240.1	168.07	117.649	82.3543	57.648	40.3536	28.2475	19.7733	13.8413	9.6889	6.78223	4.74756	3.32329	2.32631	1.62841	1.13989
TKSM10	K			1000	700	490	343	240.1	168.07	117.649	82.3543	57.648	40.3536	28.2475	19.7733	13.8413	9.6889	6.78223	4.74756	3.32329	2.32631	1.62841	1.13989
TKSM11	L			1000	700	490	343	240.1	168.07	117.649	82.3543	57.648	40.3536	28.2475	19.7733	13.8413	9.6889	6.78223	4.74756	3.32329	2.32631	1.62841	1.13989
TKSM12	M			1000	700	490	343	240.1	168.07	117.649	82.3543	57.648	40.3536	28.2475	19.7733	13.8413	9.6889	6.78223	4.74756	3.32329	2.32631	1.62841	1.13989
TKSM13	N			1000	700	490	343	240.1	168.07	117.649	82.3543	57.648	40.3536	28.2475	19.7733	13.8413	9.6889	6.78223	4.74756	3.32329	2.32631	1.62841	1.13989
TKSM14	O			1000	700	490	343	240.1	168.07	117.649	82.3543	57.648	40.3536	28.2475	19.7733	13.8413	9.6889	6.78223	4.74756	3.32329	2.32631	1.62841	1.13989
Thapsigargin	P			100	70	49	34.3	24.01	16.807	11.7649	8.23543	5.7648	4.03536	2.82475	1.97733	1.38413	0.96889	0.678223	0.474756	0.332329	0.232631	0.162841	0.113989
B	Cell response in RFU (relative fluorescence units) to the first injection of 10x library compound (panel A): average of two reads (0-4 min) after the injection of 5 µL 10x compound or blank solvent from compound plate (top panel) into the assay plate. Two reads are obtained by performing a first reading and then inverting the orientation of the plate in the plate reader for the second read.
Compound		1	2	3	4	5	6	7	8	9	10	11	12	13	14	15	16	17	18	19	20	21	22	23	24			highest value in the 384 wells
2-APB	A	0.2635	0.2464	0.3559	0.3277	0.2216	0.2656	0.2116	0.1895	0.1932	0.2002	0.2272	0.1869	0.2148	0.1705	0.1941	0.1711	0.2184	0.2143	0.1648	0.2031	0.1662	0.1827	0.1886	0.2531
TKSM1	B	0.1884	0.2082	0.2399	0.225	0.2235	0.256	0.2451	0.2196	0.2249	0.2063	0.2305	0.1954	0.2081	0.2078	0.2314	0.2221	0.2286	0.2173	0.2275	0.2333	0.1995	0.1764	0.1751	0.2019
TKSM2	C	0.2393	0.247	0.848	0.71	0.7441	0.6354	0.3742	0.3461	0.3378	0.2928	0.2631	0.2655	0.2263	0.2141	0.2599	0.2498	0.2181	0.244	0.2239	0.2579	0.2405	0.226	0.2073	0.2037
TKSM3	D	0.2229	0.2307	0.3386	0.3325	0.3281	0.3388	0.276	0.2749	0.2643	0.2696	0.2548	0.2418	0.2676	0.2716	0.2505	0.2763	0.2633	0.2362	0.2617	0.2602	0.2626	0.2492	0.2178	0.2997
TKSM4	E	0.241	0.2388	0.2481	0.26	0.2825	0.2919	0.2362	0.2764	0.2617	0.2452	0.2862	0.272	0.2538	0.2146	0.2188	0.2338	0.2666	0.2769	0.2358	0.2682	0.2566	0.2314	0.21	0.3022
TKSM5	F	0.1968	0.252	0.2377	0.2817	0.2817	0.2754	0.2934	0.2861	0.2978	0.2594	0.29	0.2941	0.268	0.2712	0.2661	0.2622	0.2314	0.2562	0.2543	0.2438	0.2429	0.225	0.2299	0.2863
TKSM6	G	0.2509	0.2398	0.2804	0.2706	0.2606	0.3075	0.2917	0.2596	0.2965	0.2728	0.2536	0.2572	0.2444	0.2732	0.2827	0.2613	0.2662	0.264	0.2522	0.2275	0.2183	0.2434	0.235	0.2236
TKSM7	H	0.1954	0.2369	0.2426	0.2208	0.2464	0.2678	0.2971	0.274	0.2388	0.288	0.2907	0.2719	0.2732	0.2601	0.2927	0.2615	0.2592	0.2861	0.3093	0.2265	0.2576	0.2473	0.239	0.2533			lowest value in the 384 wells
TKSM8	I	0.2475	0.2722	0.2398	0.2779	0.2877	0.2541	0.2465	0.2488	0.2474	0.2825	0.2817	0.2583	0.2566	0.2487	0.2675	0.2785	0.2352	0.237	0.2598	0.2492	0.2422	0.2381	0.2501	0.2707
TKSM9	J	0.2263	0.2124	0.2779	0.3043	0.3058	0.3539	0.3247	0.3177	0.2892	0.3013	0.2997	0.2634	0.277	0.2594	0.2651	0.2844	0.2448	0.2692	0.2554	0.2158	0.2477	0.2178	0.2466	0.2016
TKSM10	K	0.2146	0.2017	0.4795	0.4706	0.5303	0.3728	0.3175	0.3266	0.2939	0.299	0.281	0.2955	0.2498	0.2506	0.2755	0.2743	0.2986	0.2727	0.2433	0.2652	0.2675	0.2236	0.2024	0.2749
TKSM11	L	0.273	0.2637	0.3161	0.3456	0.3225	0.3095	0.3226	0.2879	0.2948	0.288	0.2595	0.2806	0.2569	0.2877	0.2804	0.2752	0.2598	0.2699	0.2754	0.2506	0.2257	0.2033	0.2079	0.242
TKSM12	M	0.2643	0.3024	0.3003	0.2856	0.3141	0.2791	0.2855	0.2797	0.2722	0.3071	0.3014	0.2755	0.2827	0.2552	0.2688	0.2579	0.246	0.271	0.2445	0.2547	0.2602	0.2274	0.2423	0.2477
TKSM13	N	0.3915	0.3041	0.4036	0.381	0.3601	0.3409	0.26	0.2845	0.2982	0.2791	0.2503	0.2693	0.2531	0.2765	0.3062	0.2684	0.2593	0.2623	0.2276	0.2342	0.2666	0.23	0.1729	0.2045
TKSM14	O	0.2419	0.3179	0.3873	0.3871	0.3562	0.3056	0.2844	0.2826	0.2983	0.2515	0.2641	0.2281	0.225	0.2221	0.2138	0.2375	0.2445	0.2349	0.2545	0.2304	0.2053	0.223	0.3314	0.2554
Thapsigargin	P	0.2786	0.2965	0.2401	0.3109	0.3862	0.3115	0.2556	0.2816	0.2632	0.3413	0.2804	0.2359	0.2471	0.3001	0.2687	0.2548	0.2514	0.2709	0.283	0.2877	0.2509	0.2282	0.2964	0.2946
C	Cell response in RFU (relative fluorescence units) to the 2nd injection of 1µM FFFSWGa: average of two reads (5-9 min) obtained 5 min after the 2nd injection of 5.6µL 10x FFFSWGa (10µM). Two reads are obtained by performing a first reading and then inverting the orientation of the plate in the plate reader for the second read.
Compound		1	2	3	4	5	6	7	8	9	10	11	12	13	14	15	16	17	18	19	20	21	22	23	24
2-APB	A	1.03268	0.8862	0.1775	0.24705	0.21075	0.24355	0.23115	0.253275	0.23375	0.474575	0.73045	0.864525	0.9691	0.728925	0.741525	0.88125	1.0167	0.986475	0.6347	1.04775	0.7315	0.780525	0.767625	0.927125
TKSM1	B	0.6508	0.82385	0.920575	0.88425	0.9491	0.98865	0.95805	0.947425	0.8788	0.9336	0.880075	0.832575	0.82335	0.85705	1.01493	0.7342	0.802625	0.744925	0.69865	0.801825	0.9967	0.8786	0.754775	0.9432
TKSM2	C	0.820025	0.89945	0.3135	0.2762	0.300125	0.431225	0.913425	0.861175	1.0278	0.836725	0.891675	0.873075	0.796	0.83755	0.761325	0.8044	0.8113	0.90135	0.77635	0.80875	0.812325	0.72645	0.730475	0.774175
TKSM3	D	0.798425	0.8217	0.997025	1.0914	0.9826	0.970025	0.908775	0.906175	0.913425	0.8973	0.957925	0.886375	0.87335	0.86255	0.840175	0.89825	0.892625	0.855175	0.84155	0.843525	0.80415	0.81045	0.648325	1.01655
TKSM4	E	0.752875	0.710125	0.780275	0.87755	1.0547	1.01578	0.976625	1.06232	1.149	1.02618	0.9637	1.00683	0.9148	0.772475	0.864325	0.852875	0.851325	0.955325	0.7841	0.976825	0.8178	0.795925	0.678275	1.07733
TKSM5	F	0.801725	0.899525	0.9288	1.05743	0.977875	0.98945	1.0227	1.0156	1.1065	0.318875	1.02165	0.91065	1.00293	0.930275	0.939875	0.906	0.829875	0.9794	0.96865	0.942375	0.80255	0.725525	0.744825	0.955425
TKSM6	G	0.8446	0.745175	0.913575	0.982675	1.0626	1.11593	1.0543	0.969075	0.98375	0.961175	0.8328	0.9409	0.95725	0.978025	0.839275	0.886725	0.9885	0.28195	0.99275	0.9598	0.787075	0.780125	0.7408	0.788725
TKSM7	H	0.802575	0.75885	0.838375	0.939175	0.292175	0.967425	1.03865	0.9267	0.998975	1.02067	1.1385	0.950125	1.04383	1.02168	0.866525	0.947725	0.96715	0.969225	0.877475	0.889725	0.777725	0.752325	0.875725	0.989675
TKSM8	I	0.960175	0.7894	0.8937	1.02767	0.33385	1.0333	1.0195	1.00842	0.974075	0.933925	1.0303	0.95085	0.984975	0.96135	1.02875	0.9744	0.9064	0.838525	1.01575	0.9553	0.97325	0.725075	0.97705	0.8709
TKSM9	J	0.8498	0.709925	1.01168	1.06065	1.03835	1.04717	1.12437	0.3277	1.07762	1.03435	1.0459	1.00275	0.967225	0.9709	0.958475	0.9564	0.92255	0.940725	0.939925	0.83	0.823075	0.885875	0.78785	0.70375
TKSM10	K	0.801225	0.75005	0.64405	0.839675	0.74155	0.9204	1.11217	1.09635	1.11773	1.0413	1.0857	1.11092	1.03095	1.00775	0.98865	1.09757	0.97735	1.01562	0.891175	0.9358	0.8027	0.885875	0.8631	1.01103
TKSM11	L	1.01315	0.764375	1.0033	1.10367	1.15318	1.04608	1.12628	1.03897	1.05583	1.06412	1.03307	0.865325	0.958225	0.966375	0.979925	0.925375	0.9927	0.933525	0.9174	0.823	1.00457	0.847725	0.812325	0.949325
TKSM12	M	0.87685	0.83595	0.90335	0.936375	1.04022	1.072	0.94275	0.9944	0.96695	1.01667	1.04333	1.0309	0.9971	0.95465	0.9592	0.87315	0.87015	0.9654	0.972275	0.896125	0.96245	0.834175	0.82205	0.7784
TKSM13	N	1.2174	0.8037	0.572	0.659275	0.858125	0.9704	1.0051	1.03628	1.0513	1.04168	0.892175	1.0193	1.00545	0.8833	0.91645	0.924575	0.912875	0.976725	0.75635	0.94215	0.940725	0.839675	0.6763	0.713825
TKSM14	O	0.777725	0.800675	0.270725	0.3042	0.31045	0.62105	0.90555	0.948925	0.96165	0.8705	0.949275	0.954475	0.92715	0.836175	0.802975	0.890125	0.90295	0.8988	0.897025	0.798325	0.79615	0.792225	1.11598	0.805475
Thapsigargin	P	0.923075	0.97065	0.777575	0.987825	1.20277	0.9811	0.887225	0.955275	0.870325	1.11822	0.883225	0.836525	0.791975	0.944225	0.8622	0.784325	0.809025	0.896425	0.96325	0.932625	0.79645	0.832325	0.93545	0.9229
	Positive Control	0.844554	average of reads from 64 positive control wells (column 1, 2, 23, and 24)
D
% of the RFU of PC		1	2	3	4	5	6	7	8	9	10	11	12	13	14	15	16	17	18	19	20	21	22	23	24
2-APB	A	1.22268	1.04925	0.210159	0.292505	0.249526	0.288361	0.27368	0.299876	0.276758	0.561893	0.864847	1.02359	1.14741	0.863042	0.87796	1.04339	1.20377	1.16798	0.75148	1.24053	0.86609	0.924136	0.908862	1.09771
TKSM1	B	0.770542	0.975432	1.08995	1.04695	1.12373	1.17055	1.13432	1.12174	1.04049	1.10538	1.042	0.985762	0.97484	1.01474	1.20166	0.869287	0.950302	0.881986	0.827196	0.949355	1.18009	1.04026	0.893648	1.11674
TKSM2	C	0.970903	1.06494	0.371182	0.327019	0.355346	0.510567	1.08149	1.01962	1.21691	0.990676	1.05574	1.03371	0.942458	0.991653	0.901403	0.952404	0.960573	1.06719	0.919193	0.957554	0.961787	0.860111	0.864877	0.916617
TKSM3	D	0.945329	0.972887	1.18047	1.29221	1.16339	1.1485	1.07598	1.0729	1.08149	1.0624	1.13418	1.04946	1.03404	1.02125	0.994761	1.06352	1.05686	1.01252	0.996389	0.998727	0.952108	0.959567	0.767612	1.20359
TKSM4	E	0.891398	0.840783	0.92384	1.03901	1.24876	1.20267	1.15632	1.25778	1.36041	1.21498	1.14101	1.19207	1.08312	0.914605	1.02335	1.0098	1.00796	1.1311	0.928368	1.15655	0.968269	0.942369	0.803072	1.27554
TKSM5	F	0.949236	1.06503	1.09969	1.25198	1.1578	1.1715	1.21087	1.20246	1.31009	0.377546	1.20963	1.0782	1.18746	1.10144	1.1128	1.0727	0.982566	1.1596	1.14687	1.11576	0.950213	0.859016	0.881867	1.13122
TKSM6	G	1	0.882282	1.08167	1.16348	1.25811	1.32125	1.24828	1.14738	1.16475	1.13802	0.986029	1.11402	1.13338	1.15797	0.993695	1.04988	1.17038	0.333827	1.17541	1.1364	0.931891	0.923662	0.877102	0.933844
TKSM7	H	0.950243	0.898473	0.99263	1.11198	0.345933	1.14542	1.22975	1.09721	1.18278	1.20847	1.34798	1.12494	1.23588	1.20966	1.02596	1.1221	1.1451	1.14756	1.03892	1.05343	0.920821	0.890747	1.03685	1.17177
TKSM8	I	1.13684	0.934644	1.05813	1.21676	0.395276	1.22342	1.20708	1.19397	1.1533	1.10576	1.21987	1.1258	1.1662	1.13823	1.21803	1.15368	1.07317	0.992807	1.20264	1.13107	1.15232	0.858483	1.15682	1.03114
TKSM9	J	1.00616	0.840546	1.19782	1.2558	1.2294	1.23985	1.33125	0.387994	1.2759	1.22466	1.23834	1.18725	1.14519	1.14954	1.13483	1.13237	1.09229	1.11381	1.11286	0.982714	0.974515	1.04887	0.932808	0.833235
TKSM10	K	0.948644	0.888054	0.76255	0.994169	0.87799	1.08975	1.31681	1.29807	1.32338	1.23289	1.28546	1.31533	1.22064	1.19317	1.17055	1.29952	1.15717	1.20249	1.05514	1.10798	0.950391	1.04887	1.0219	1.19705
TKSM11	L	1.19956	0.905014	1.1879	1.30674	1.36535	1.23854	1.3335	1.23014	1.25009	1.25992	1.22315	1.02454	1.13453	1.14418	1.16022	1.09564	1.17535	1.10529	1.08619	0.974426	1.18941	1.0037	0.961787	1.12399
TKSM12	M	1.03818	0.989758	1.06956	1.10866	1.23162	1.26924	1.11621	1.17736	1.14486	1.20374	1.23529	1.22058	1.18056	1.1303	1.13569	1.0338	1.03025	1.14303	1.15117	1.06101	1.13953	0.987657	0.973301	0.92162
TKSM13	N	1.44139	0.951575	0.677244	0.780577	1.01601	1.14895	1.19003	1.22694	1.24473	1.23334	1.05633	1.20684	1.19045	1.04582	1.08507	1.09469	1.08084	1.15643	0.895513	1.1155	1.11381	0.994169	0.800734	0.845163
TKSM14	O	0.920821	0.947993	0.320536	0.36017	0.36757	0.735318	1.07216	1.12352	1.13859	1.03067	1.12393	1.13009	1.09774	0.990025	0.950716	1.0539	1.06909	1.06417	1.06207	0.945211	0.942636	0.937988	1.32131	0.953676
Thapsigargin	P	1.09291	1.14924	0.920643	1.16958	1.42408	1.16161	1.05047	1.13104	1.03046	1.32397	1.04573	0.990439	0.937692	1.11796	1.02084	0.928635	0.957879	1.06136	1.14048	1.10422	0.942991	0.985466	1.10757	1.09271

## Sheet: Suppl. Table4. screening-2
	Title: The cattle fever tick, Rhipicephalus microplus, as a model for forward pharmacology to elucidate kinin GPCR function in the Acari
	Supplementary Table 4. Second screening of "library subset " in 384-well plate format. Panel A shows in each well the 10x concentration of each compound; final concentration in the assay is 1x; Panel B is the response (1-4 min after the 1st injection) of BMLK3 (tick kinin rceptor recombinant cell line, left half of the assay plate) and vector only cells (empty vector transfected cell line, right …
				Small molecules were serially diluted 1: 1.4, 9 times, from the various initial concentrations (in column 3, 80 µl ) into the most diluted column 12, by transferring 56 µl solution of previous higher concentration into the next well and mixing with 24 µl of blank solvent (10% DMSO). A duplicate dilution was made from column 22 (initial highest concentration) to column 13 (most diluted). The magen…
A
	Library plate: 10x of the final concentration solution, prepared in 10 % DMSO in Hanks’ Saline Buffer containing 20 mM Hepes (HHBS)
Compound	Unit: µM	1	2	3	4	5	6	7	8	9	10	11	12	13	14	15	16	17	18	19	20	21	22	23	24
Thap	A	Blank solvent (10 % DMSO in HHBS)		100	70	49	34.3	24.01	16.807	11.7649	8.23543	5.7648	4.03536	4.03536	5.7648	8.23543	11.7649	16.807	24.01	34.3	49	70	100	Blank solvent (10 % DMSO in HHBS)
TKSM5	B			100	70	49	34.3	24.01	16.807	11.7649	8.23543	5.7648	4.03536	4.03536	5.7648	8.23543	11.7649	16.807	24.01	34.3	49	70	100
TKSM7	C			100	70	49	34.3	24.01	16.807	11.7649	8.23543	5.7648	4.03536	4.03536	5.7648	8.23543	11.7649	16.807	24.01	34.3	49	70	100
TKSM8	D			500	350	245	171.5	120.05	84.035	58.8245	41.1771	28.824	20.1768	20.1768	28.824	41.1771	58.8245	84.035	120.05	171.5	245	350	500
TKSM14	E			500	350	245	171.5	120.05	84.035	58.8245	41.1771	28.824	20.1768	20.1768	28.824	41.1771	58.8245	84.035	120.05	171.5	245	350	500
TKSM2	F			1000	700	490	343	240.1	168.07	117.649	82.3543	57.648	40.3536	40.3536	57.648	82.3543	117.649	168.07	240.1	343	490	700	1000
TKSM10	G			1000	700	490	343	240.1	168.07	117.649	82.3543	57.648	40.3536	40.3536	57.648	82.3543	117.649	168.07	240.1	343	490	700	1000
TKSM13	H			1000	700	490	343	240.1	168.07	117.649	82.3543	57.648	40.3536	40.3536	57.648	82.3543	117.649	168.07	240.1	343	490	700	1000
TKSM4	I			50	35	24.5	17.15	12.005	8.4035	5.88245	4.11771	2.8824	2.01768	2.01768	2.8824	4.11771	5.88245	8.4035	12.005	17.15	24.5	35	50
TKSM6	J			10	7	4.9	3.43	2.401	1.6807	1.17649	0.823543	0.57648	0.403536	0.403536	0.57648	0.823543	1.17649	1.6807	2.401	3.43	4.9	7	10
TKSM9	K			100	70	49	34.3	24.01	16.807	11.7649	8.23543	5.7648	4.03536	4.03536	5.7648	8.23543	11.7649	16.807	24.01	34.3	49	70	100
2-APB	L			100	70	49	34.3	24.01	16.807	11.7649	8.23543	5.7648	4.03536	4.03536	5.7648	8.23543	11.7649	16.807	24.01	34.3	49	70	100
TKSM2	M	2% DMSO in HHBS 1 (see note at the bottom)		1000	700	490	343	240.1	168.07	117.649	82.3543	57.648	40.3536	40.3536	57.648	82.3543	117.649	168.07	240.1	343	490	700	1000	2% DMSO in HHBS 1 (see note at the bottom)
TKSM10	N			1000	700	490	343	240.1	168.07	117.649	82.3543	57.648	40.3536	40.3536	57.648	82.3543	117.649	168.07	240.1	343	490	700	1000
TKSM13	O			1000	700	490	343	240.1	168.07	117.649	82.3543	57.648	40.3536	40.3536	57.648	82.3543	117.649	168.07	240.1	343	490	700	1000
TKSM14	P			500	350	245	171.5	120.05	84.035	58.8245	41.1771	28.824	20.1768	20.1768	28.824	41.1771	58.8245	84.035	120.05	171.5	245	350	500
B	Cell response in RFU (relative fluorescence units) to the first injection of 10x library compound (panel A): average of two reads (0-4 min) after the injection of 5 µL 10x compound or blank solvent from compound plate (top panel) into the assay plate. Two reads are obtained by performing a first reading and then inverting the orientation of the plate in the plate reader for the second read.
Compound		1	2	3	4	5	6	7	8	9	10	11	12	13	14	15	16	17	18	19	20	21	22	23	24
Thap	A	0.065	0.225	1.6121	2.1302	2.1519	1.7569	2.1769	1.4702	2.374	1.2116	1.0908	0.6384	1.0694	0.5071	1.8103	1.9908	2.4275	2.458	2.1758	2.8492	2.3463	2.4557	0.0625	0.1138
TKSM5	B	-0.0392	0.0419	-0.0278	-0.0094	0.054	0.0658	0.0551	0.04	0.0424	0.0564	-0.0266	0.0106	0.1018	0.0047	0.089	0.0408	0.08	-0.0268	0.0154	0.0527	-0.0351	0.0524	0.0729	0.0263
TKSM7	C	0.0791	0.0624	0.0142	0.0043	0.109	-0.0069	0.0737	0.0106	0.0057	0.0612	0.066	0.0448	0.0724	0.0341	0.0827	0.0247	0.0499	0.087	0.0367	-0.0373	0.0607	0.0626	0.0307	0.0355
TKSM8	D	-0.0144	0.0029	-0.068	0.081	0.0131	0.0313	0.0226	0.0709	0.1582	0.0288	0.0323	0.047	0.0309	0.0413	0.055	0.0672	0.0308	0.0562	0.0877	0.0093	0.0398	0.0714	0.0341	0.0624			highest value in the 384 wells
TKSM14	E	0.0347	0.0053	0.2728	0.112	0.1054	0.1757	-0.0175	0.1483	0.0912	0.0991	0.0863	0.0198	0.0459	0.0689	0.0777	0.0079	0.0901	0.0979	0.1665	0.1785	0.1118	0.2437	0.1585	-0.0142
TKSM2	F	0.0179	0.0296	0.7043	0.8064	0.6633	0.5832	0.4893	0.4156	0.2236	0.1943	0.1295	0.1726	0.0408	0.0723	0.2744	0.3283	0.3752	0.6272	0.7111	0.5455	0.5652	0.3954	0.045	0.0351
TKSM10	G	0.0259	0.0153	0.2522	0.3523	0.3408	0.1871	0.2543	0.1404	0.1999	0.0553	0.0595	0.0271	0.0329	0.0478	-0.0143	0.0539	0.0841	0.1991	0.3078	0.2654	0.4409	0.4897	0.0068	0.02
TKSM13	H	-0.0292	0.0057	0.2434	0.2273	0.2891	0.3242	0.3349	0.2527	0.2065	0.0757	0.0813	0.0899	0.0875	0.0928	0.1087	0.2197	0.3128	0.2629	0.3992	0.2677	0.3457	0.3006	0.045	0.0267
TKSM4	I	0.0728	0.0492	0.1125	0.1164	0.0828	0.0506	0.034	0.0382	0.0532	0.0735	0.0224	0.04	0.0623	0.0327	0.0626	0.0211	0.066	0.0825	0.0076	0.0256	0.0363	0.0097	0.0535	0.0119
TKSM6	J	0.1054	0.0533	0.0892	0.0674	0.0105	0.0192	0.0351	0.0474	0.0646	0.072	0.0745	0.0444	0.0546	0.0421	0.0699	0.0438	0.0511	0.068	0.0535	0.0123	-0.0517	0.0465	-0.0207	-0.0129
TKSM9	K	0.124	0.0685	0.1572	0.0387	0.0226	0.095	0.0066	0.0334	0.0513	0.083	0.0858	0.0445	0.0151	0.0329	0.0635	0.0693	0.0732	0.078	0.1372	0.0572	-0.0117	0.1765	0.073	0.0284			lowest value in the 384 wells
2-APB	L	0.0878	0.0594	0.1355	0.1858	0.1434	0.118	0.1489	0.0512	0.0808	0.0626	0.0612	0.0934	0.0387	0.0972	0.0113	0.1503	0.1417	0.1397	0.1146	0.1268	0.1316	0.0957	0.0262	0.0312
TKSM2	M	0.056	0.0392	0.3559	0.3201	0.3253	0.3914	0.3821	0.3105	0.0919	0.1336	0.1095	0.1109	0.0775	0.0724	0.1159	0.2231	0.3132	0.2489	0.4245	0.5752	0.4924	0.4382	0.0057	0.0217
TKSM10	N	0.003	0.0377	0.2124	0.1574	0.1739	0.076	0.1014	0.0316	0.0696	0.0148	0.0132	0.051	0.0559	0.086	0.0235	0.0233	0.0899	0.0306	0.0117	0.0471	0.0396	0.1007	0.001	0.0435
TKSM13	O	0.0211	0.0329	0.1242	0.1315	0.101	0.1283	0.086	0.1495	0.0644	0.0338	0.0276	0.0122	0.0759	0.1067	0.045	0.0918	0.2172	0.1377	0.0805	0.1253	0.1257	0.1286	0.0663	0.0694
TKSM14	P	0.0433	0.0122	0.0871	0.0891	0.1213	0.1116	0.0044	0.0399	0.0509	0.0213	0.0073	0.0347	0.0416	0.0017	-0.0352	0.0446	0.0252	0.0516	-0.0745	0.1242	0.1046	-0.009	0.0488	0.0045
		BMLK3 cells												Vector Only cells
C	Cell response in RFU (relative fluorescence units) to the 2nd injection of 1µM FFFSWGa: average of two reads (5-9 min) obtained 5 min after the 2nd injection of 5.6µL 10x FFFSWGa (10µM). Two reads are obtained by performing a first reading and then inverting the orientation of the plate in the plate reader for the second read.
Compound		1*	2	3	4	5	6	7	8	9	10	11	12	13	14	15	16	17	18	19	20	21	22	23	24
Thap	A	0.5575	0.5712	1.0796	1.3972	1.4019	1.0819	1.4419	1.1342	1.33	1.2946	1.3353	1.4749	1.3309	1.131	1.3113	1.0988	1.387	1.221	1.0493	1.2637	1.1198	1.1137	-0.01035	0.014
TKSM5	B	0.60615	0.57275	0.59705	0.5434	0.652	0.7803	0.5994	0.566	0.64345	0.5961	0.5169	0.6585	0.0871	0.0302	0.0909	0.0587	0.08295	0.0066	0.04365	0.0016	0.00375	0.02145	0.00085	0.04
TKSM7	C	0.7454	0.6256	0.65305	0.4385	0.6229	0.71105	0.639	0.62745	0.64505	0.64655	0.71895	0.65385	0.0242	0.01735	0.0313	0.018	0.0319	0.04795	0.0221	-0.0193	0.06975	-0.02705	0.05075	-0.01075
TKSM8	D	0.492	0.5807	0.53175	0.6509	0.588	0.5757	0.6655	0.55785	0.70735	0.63715	0.67805	0.5899	0.02155	0.06465	0.0475	0.0848	0.0571	0.13455	0.1866	0.13655	0.23335	0.35175	-0.0025	0.1961
TKSM14	E	0.75905	0.68475	0.2203	0.2215	0.32665	0.58475	0.46745	0.5849	0.63935	0.6884	0.5951	0.60925	0.04825	0.0896	0.04825	-0.0286	0.04585	-0.00045	0.08625	0.1059	-0.0221	0.01665	0.1375	0.00375
TKSM2	F	0.501	0.6365	0.0333	0.16995	0.36875	0.59955	0.9953	0.8555	0.8369	0.8341	0.7757	0.68845	0.04875	0.01575	0.17915	0.21395	0.2449	0.32305	0.31395	0.3176	0.2872	0.1093	0.1032	0.0645
TKSM10	G	0.5143	0.59	0.13585	0.2936	0.7831	0.67995	0.8093	0.8035	0.7811	0.7781	0.7113	0.7147	0.0083	0.04545	0.0175	0.13095	0.11615	0.20775	0.2118	0.2272	0.30285	0.34055	0.0807	0.12035
TKSM13	H	0.58275	0.7478	0.40345	0.57905	0.2242	0.31395	0.2766	0.5048	0.6594	0.6011	0.716	0.63455	0.11005	0.09765	0.15275	0.17725	0.20975	0.20895	0.22275	0.19205	0.2745	0.206	0.097	0.10655
TKSM4	I	0.66765	0.6484	0.56545	0.67945	0.6205	0.53065	0.6849	0.67485	0.6617	0.65825	0.53445	0.57245	0.0372	0.0577	0.06005	0.0927	0.1068	0.0726	-0.016	0.0704	0.0129	0.051	0.04955	0.0528
TKSM6	J	0.5452	0.58215	0.61615	0.70045	0.7757	0.7792	0.61865	0.67275	0.6368	0.6411	0.7111	0.6037	0.05105	0.05455	0.07385	0.0655	0.0862	0.06765	0.0288	0.03675	0.07235	0.0492	0.00845	0.0987
TKSM9	K	0.03415	0.7112	0.7349	0.9113	0.8805	0.6378	0.8623	0.67165	0.6501	0.686	0.6147	0.6537	0.0414	0.1551	0.06855	0.14065	0.08445	0.09675	0.08825	0.0921	0.0286	0.08555	0.06925	0.07795
2-APB	L	0.0206	0.7102	-0.03965	-0.01835	-0.00515	-0.00495	0.0351	0.55505	0.1985	0.2246	0.422	0.4117	0.0089	0.06725	0.06575	0.0643	0.0716	0.01565	0.0535	0.02515	0.00155	-0.02145	0.0963	0.0699
TKSM2	M	0.07025	0.65435	0.593	0.7087	0.8868	0.7748	0.8835	0.7775	1.1778	0.9831	0.6315	0.7781	0.06765	0.08445	0.09235	0.164	0.26605	0.31645	0.42025	0.41745	0.35185	0.2478	0.0496	0.08055
TKSM10	N	0.0225	0.6749	1.0272	0.8583	1.0901	0.8799	0.8387	0.7587	0.7677	0.7225	0.6947	0.7295	0.05475	0.1089	0.04445	0.07215	0.1342	0.079	0.12615	0.12615	0.1276	0.23245	0.0408	0.1297
TKSM13	O	0.4507	0.6446	0.7065	0.7632	0.7525	0.4241	0.4661	0.4489	0.8189	0.6434	0.5924	0.52565	0.0816	0.08555	0.135	0.1122	0.19565	0.15095	0.13075	0.1548	0.1545	0.1547	0.08195	0.0682
TKSM14	P	0.5263	0.60665	0.09735	0.53505	0.4268	0.4669	0.5275	0.44495	0.54665	0.789	0.752	0.69485	0.1066	0.10455	0.02685	0.08955	0.07745	0.0394	-0.07525	0.01515	0.02555	-0.0207	0.00535	-0.0359
		BMLK3 cells												Vector Only cells
	Positive control	0.638438	average of reads from 12 positive control wells (column 2 well A-L)					* the reads from column1 were not used for calculating response of BMLK3 to PC
	% of the RFU of PC
D		1*	2	3	4	5	6	7	8	9	10	11	12	13	14	15	16	17	18	19	20	21	22	23	24
Thap	A	0.871094	0.8925	1.68688	2.18312	2.19047	1.69047	2.25297	1.77219	2.07812	2.02281	2.08641	2.30453	2.07953	1.76719	2.04891	1.71687	2.16719	1.90781	1.63953	1.97453	1.74969	1.74016	-0.0161719	0.021875
TKSM5	B	0.947109	0.894922	0.932891	0.849062	1.01875	1.21922	0.936563	0.884375	1.00539	0.931406	0.807656	1.02891	0.136094	0.0471875	0.142031	0.0917187	0.129609	0.0103125	0.0682031	0.0025	0.00585937	0.0335156	0.00132812	0.0625
TKSM7	C	1.16469	0.9775	1.02039	0.685156	0.973281	1.11102	0.998437	0.980391	1.00789	1.01023	1.12336	1.02164	0.0378125	0.0271094	0.0489062	0.028125	0.0498438	0.0749219	0.0345313	-0.0301562	0.108984	-0.0422656	0.0792969	-0.0167969
TKSM8	D	0.76875	0.907344	0.830859	1.01703	0.91875	0.899531	1.03984	0.871641	1.10523	0.995547	1.05945	0.921719	0.0336719	0.101016	0.0742188	0.1325	0.0892187	0.210234	0.291563	0.213359	0.364609	0.549609	-0.00390625	0.306406
TKSM14	E	1.18602	1.06992	0.344219	0.346094	0.510391	0.913672	0.730391	0.913906	0.998984	1.07563	0.929844	0.951953	0.0753906	0.14	0.0753906	-0.0446875	0.0716406	-0.000703125	0.134766	0.165469	-0.0345313	0.0260156	0.214844	0.00585937
TKSM2	F	0.782812	0.994531	0.0520312	0.265547	0.576172	0.936797	1.55516	1.33672	1.30766	1.30328	1.21203	1.0757	0.0761719	0.0246094	0.279922	0.334297	0.382656	0.504766	0.490547	0.49625	0.44875	0.170781	0.16125	0.100781
TKSM10	G	0.803594	0.921875	0.212266	0.45875	1.22359	1.06242	1.26453	1.25547	1.22047	1.21578	1.11141	1.11672	0.0129687	0.0710156	0.0273437	0.204609	0.181484	0.324609	0.330937	0.355	0.473203	0.532109	0.126094	0.188047
TKSM13	H	0.910547	1.16844	0.630391	0.904766	0.350312	0.490547	0.432188	0.78875	1.03031	0.939219	1.11875	0.991484	0.171953	0.152578	0.238672	0.276953	0.327734	0.326484	0.348047	0.300078	0.428906	0.321875	0.151563	0.166484
TKSM4	I	1.0432	1.01312	0.883516	1.06164	0.969531	0.829141	1.07016	1.05445	1.03391	1.02852	0.835078	0.894453	0.058125	0.0901562	0.0938281	0.144844	0.166875	0.113437	-0.025	0.11	0.0201563	0.0796875	0.0774219	0.0825
TKSM6	J	0.851875	0.909609	0.962734	1.09445	1.21203	1.2175	0.966641	1.05117	0.995	1.00172	1.11109	0.943281	0.0797656	0.0852344	0.115391	0.102344	0.134687	0.105703	0.045	0.0574219	0.113047	0.076875	0.0132031	0.154219
TKSM9	K	0.0533594	1.11125	1.14828	1.42391	1.37578	0.996563	1.34734	1.04945	1.01578	1.07188	0.960469	1.02141	0.0646875	0.242344	0.107109	0.219766	0.131953	0.151172	0.137891	0.143906	0.0446875	0.133672	0.108203	0.121797
2-APB	L	0.0321875	1.10969	-0.0619531	-0.0286719	-0.00804687	-0.00773438	0.0548437	0.867266	0.310156	0.350937	0.659375	0.643281	0.0139063	0.105078	0.102734	0.100469	0.111875	0.0244531	0.0835937	0.0392969	0.00242187	-0.0335156	0.150469	0.109219
TKSM2	M	0.109766	1.02242	0.926562	1.10734	1.38563	1.21063	1.38047	1.21484	1.84031	1.53609	0.986719	1.21578	0.105703	0.131953	0.144297	0.25625	0.415703	0.494453	0.656641	0.652266	0.549766	0.387188	0.0775	0.125859
TKSM10	N	0.0351563	1.05453	1.605	1.34109	1.70328	1.37484	1.31047	1.18547	1.19953	1.12891	1.08547	1.13984	0.0855469	0.170156	0.0694531	0.112734	0.209687	0.123437	0.197109	0.197109	0.199375	0.363203	0.06375	0.202656
TKSM13	O	0.704219	1.00719	1.10391	1.1925	1.17578	0.662656	0.728281	0.701406	1.27953	1.00531	0.925625	0.821328	0.1275	0.133672	0.210937	0.175312	0.305703	0.235859	0.204297	0.241875	0.241406	0.241719	0.128047	0.106562
TKSM14	P	0.822344	0.947891	0.152109	0.836016	0.666875	0.729531	0.824219	0.695234	0.854141	1.23281	1.175	1.0857	0.166563	0.163359	0.0419531	0.139922	0.121016	0.0615625	-0.117578	0.0236719	0.0399219	-0.0323437	0.00835937	-0.0560938
		BMLK3 cells												Vector Only cells
		* the reads from column1 were not used for calculating response of BMLK3 to PC
	Note 1	row M-P was prepared in 2 % DMSO as controls for DMSO concetration, it was not discussed in the context of this manuscript as there is no obvious effect of DMSO concentration was bserved.
